# Supplementary material for: CuFe2O4 magnetic nanoparticle catalyzed odorless synthesis of sulfides using phenylboronic acid and aryl halides in the presence of S8
Source: Royal Society of Chemistry journal article supplement (doi:10.1039/c6nj01434h), 2016-01-01
Supplement: c6nj01434h1.pdf [file c6nj01434h1.pdf]

## Supporting Information

CuFe<sub>2</sub>O<sub>4</sub> magnetic nanoparticles catalyzed odorless synthesis of sulfides using phenylboronic acid, aryl halides in the presence of S<sub>8</sub>

Kamran Amiri, Amin Rostami\*, Abed Rostami

### New Journal of Chemistry

|                                                                            |           |
|----------------------------------------------------------------------------|-----------|
| <b>1. General information</b> -----                                        | <b>S1</b> |
| 2. Copies of the selected <sup>1</sup> H NMR and <sup>13</sup> C NMR ----- | S2-11     |
| 3. Reference-----                                                          | S12       |

## 1. General information

All chemicals were purchased from commercial suppliers and used without further purification.  $^1\text{H}$  and  $^{13}\text{C}$  NMR spectra were collected on 250 or 400 MHz NMR spectrometers using  $\text{CDCl}_3$  as solvent. Chemical shifts for protons are reported in parts per million downfield and are referenced to residual protium in the NMR solvent ( $\text{CHCl}_3 = \delta 7.26$ ). Chemical shifts for carbon are reported in parts per million downfield and are referenced to the carbon resonances of the solvent ( $\text{CDCl}_3 = \delta 77.0$ ).

# The <sup>1</sup>H NMR and <sup>13</sup>C NMR spectra of 4-methoxy diphenyl sulfide (Table 2, entry 2) [4]

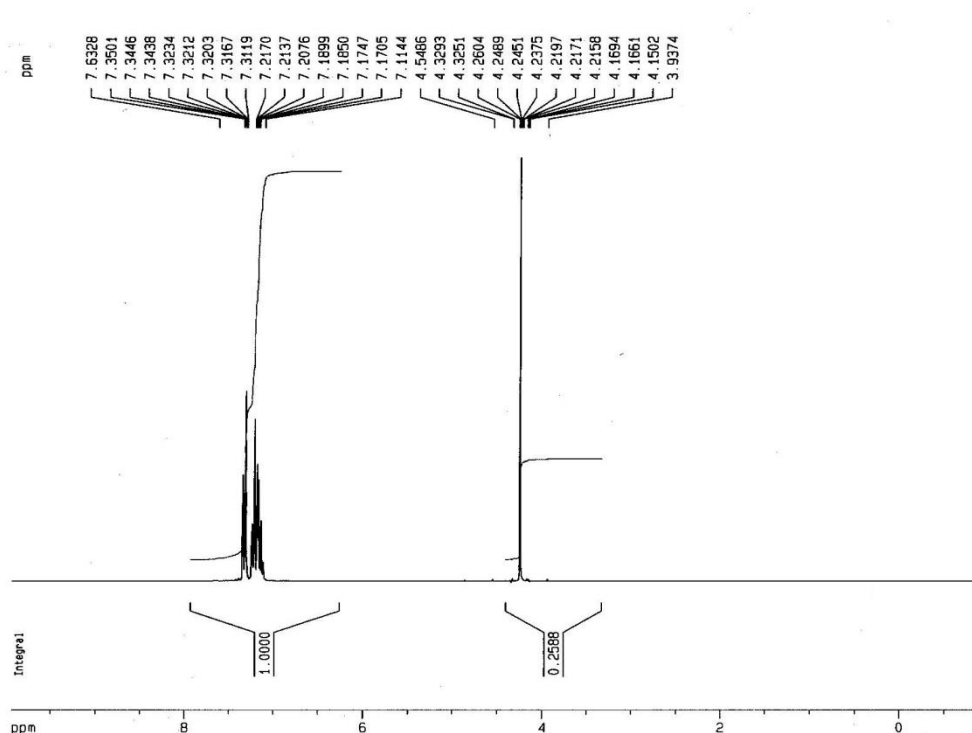

```

Current Data Parameters
NAME      Rosta1-H-63
EXPNO    1
PROCNO   1

F2 - Acquisition Parameters
Date_    20150703
Time     11.09
INSTRUM  spect
PROBHD   5 mm Dual 13C/
PULPROG  zg
TD        31054
SOLVENT  CDCl3
NS        10
DS        0
SWH       5175.983 Hz
FIDRES    0.166577 Hz
AQ        2.9999655 sec
RG        71.8
DW        96.600 usec
DE        6.00 usec
TE        0.0 K
D1        1.50000000 sec
MCREST    0.00000000 sec
MCMRK     0.01500000 sec

===== CHANNEL f1 =====
NUC1      1H
P1        11.70 usec
PL1       -3.00 dB
SFO1      250.1315447 MHz

F2 - Processing parameters
SI         32768
SF         250.1300326 MHz
WDW        EM
SSB        0
LB         0.00 Hz
GB         0
PC         1.50

1D NMR plot parameters
CX         20.00 cm
CY         10.00 cm
F1P        9.939 ppm
F1         2486.08 Hz
F2P        -0.895 ppm
F2         -223.74 Hz
PPMCH      0.54168 ppm/cm
HZCM       135.49117 Hz/cm
    
```

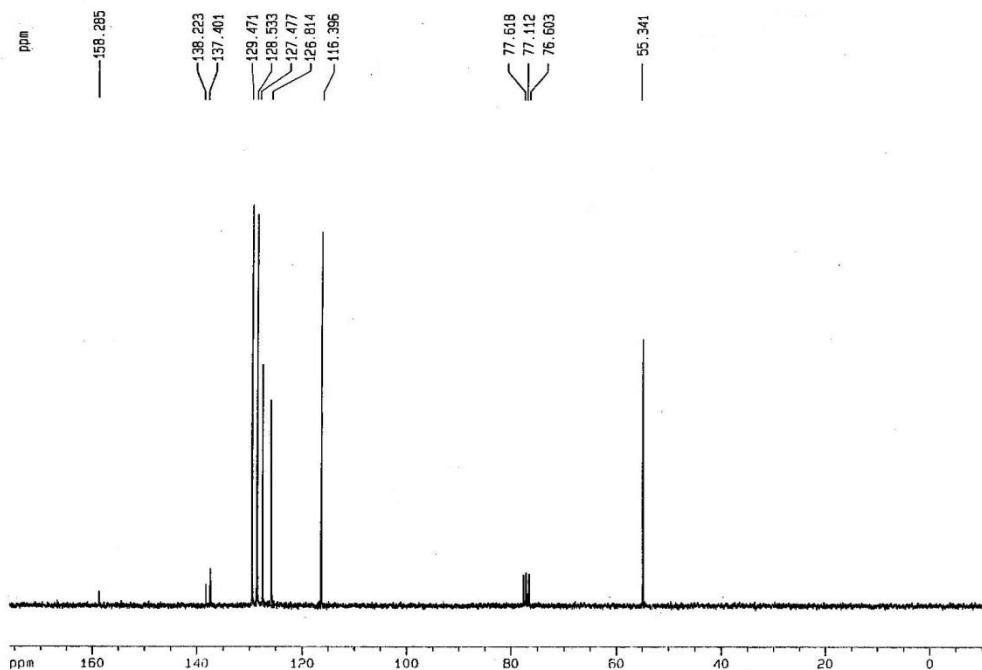

```

Current Data Parameters
NAME      Rosta1-C-13
EXPNO    1
PROCNO   1

F2 - Acquisition Parameters
Date_    20150607
Time     11.10
INSTRUM  spect
PROBHD   5 mm Dual 13C/
PULPROG  zgpg
TD        31054
SOLVENT  CDCl3
NS        100
DS        0
SWH       15060.241 Hz
FIDRES    0.384641 Hz
AQ        1.29999628 sec
RG        32768
DW        33.200 usec
DE        8.00 usec
TE        0.0 K
D1        1.29999605 sec
d11       0.03000000 sec
DELTA     1.19999993 sec
MCREST    0.00000000 sec
MCMRK     0.01500000 sec

===== CHANNEL f1 =====
NUC1      13C
P1        10.50 usec
PL1       -1.00 dB
SFO1      62.8015200 MHz

===== CHANNEL f2 =====
CPDPRG2  waltz16
NUC2      1H
PCPD2     97.00 usec
PL2       -3.00 dB
PL12      17.00 dB
PL13      17.00 dB
SFO2      250.1310005 MHz

F2 - Processing parameters
SI         32768
SF         62.8952930 MHz
WDW        EM
SSB        0
LB         1.00 Hz
GB         0
PC         1.50

1D NMR plot parameters
CX         20.00 cm
CY         10.00 cm
F1P        175.905 ppm
F1         11069.23 Hz
F2P        -10.851 ppm
F2         -852.49 Hz
PPMCH      9.34229 ppm/cm
HZCM       107.4074 Hz/cm
    
```

The <sup>1</sup>H-NMR and <sup>13</sup>C-NMR spectra of phenyl *p*-tolyl sulfide (Table 2, entry 3) [1]

Sample code:1 ( rostami )

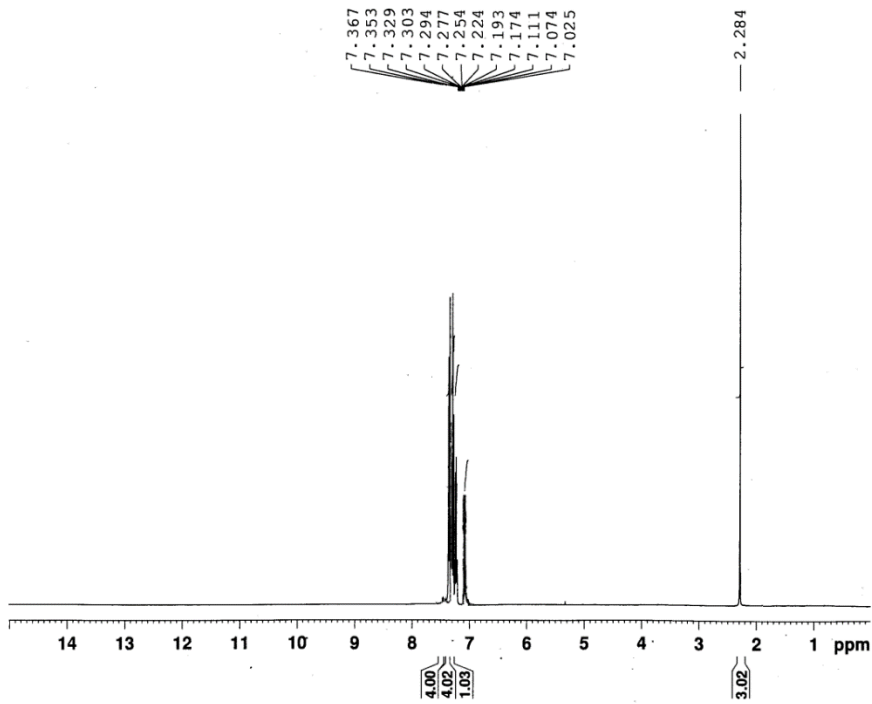

**BRUKER**

NAME Kurdistan UN  
EXPNO 87  
PROCNO 1  
Date\_ 20150510  
Time\_ 8.30  
INSTRUM spect  
PROBHD 5 mm PABBO BB-  
PULPROG zg30  
TD 65536  
SOLVENT CDCl3  
NS 16  
DS 0  
SWH 8012.820 Hz  
FIDRES 0.122266 Hz  
AQ 4.0894966 sec  
RG 57  
DW 62.400 usec  
DE 6.30 usec  
TE 292.9 K  
D1 4.00000000 sec  
TDO 1

----- CHANNEL f1 -----  
NUC1 1H  
P1 14.00 usec  
PL1 -2.00 dB  
PL1W 11.86359406 W  
SFO1 400.2236020 MHz  
SI 32768  
SF 400.2200000 MHz  
WDW EM  
SSB 0  
LB 0.30 Hz  
GB 0  
PC 1.00

Sample code: 1 ( rostami )

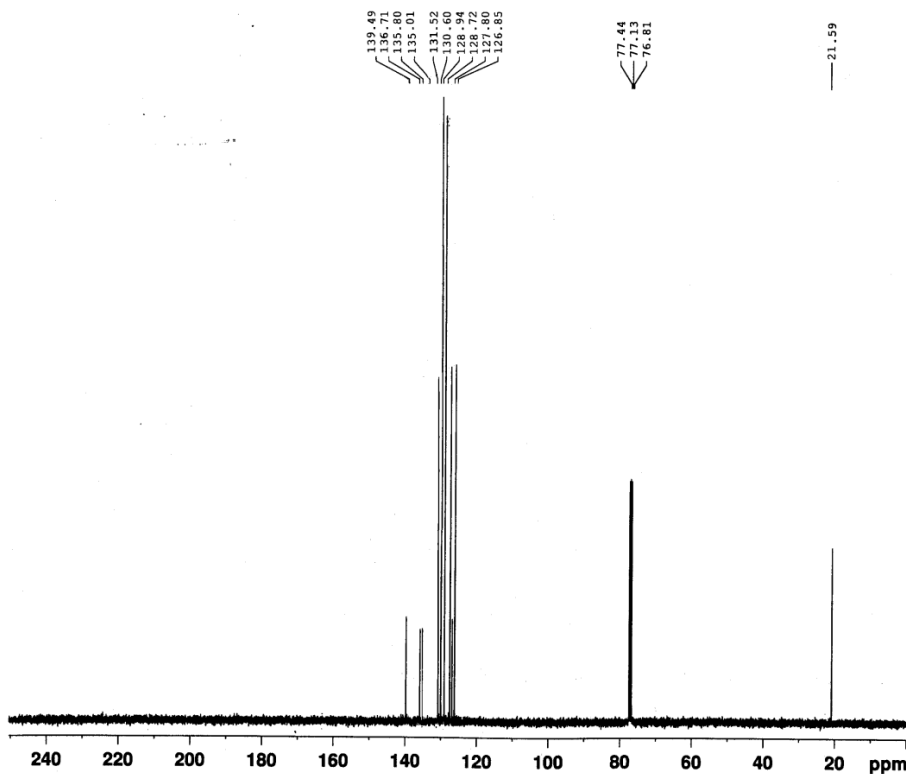

**BRUKER**

NAME Kurdistan UN  
EXPNO 88  
PROCNO 1  
Date\_ 20150510  
Time\_ 8.34  
INSTRUM spect  
PROBHD 5 mm PABBO BB-  
PULPROG zgpg30  
TD 65536  
SOLVENT CDCl3  
NS 50  
DS 0  
SWH 25252.525 Hz  
FIDRES 0.385323 Hz  
AQ 1.2976629 sec  
RG 2050  
DW 19.800 usec  
DE 6.50 usec  
TE 293.1 K  
D1 2.00000000 sec  
D11 0.03000000 sec  
TDO 1

----- CHANNEL f1 -----  
NUC1 13C  
P1 9.00 usec  
PL1 -0.90 dB  
PL1W 42.02801895 W  
SFO1 100.6479784 MHz

----- CHANNEL f2 -----  
CPDPRG2 waltz16  
NUC2 1H  
PCPD2 90.00 usec  
PL2 -2.00 dB  
PL12 14.16 dB  
PL13 17.90 dB  
PL2W 11.86359406 W  
PL12W 0.28722104 W  
PL13W 0.12139934 W  
SFO2 400.2216009 MHz  
SI 32768  
SF 100.6353990 MHz  
WDW EM  
SSB 0  
LB 1.00 Hz  
GB 0  
PC 1.40

# The <sup>1</sup>H-NMR and <sup>13</sup>C-NMR spectra of 1-naphthyl phenyl sulfide (Table 2, entry 9) [2]

Sample code:9 ( rostami )

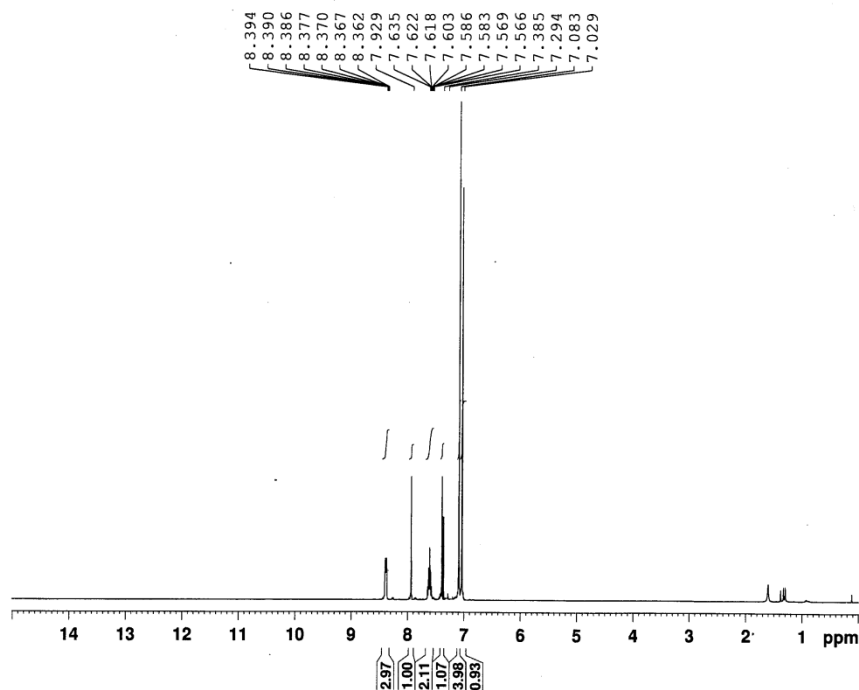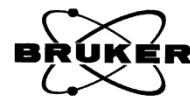

```

NAME      Kurdistan UN
EXPNO     100
PROCNO    1
Date_     20150510
Time      10.10
INSTRUM   spect
PROBHD    5 mm PABBO BB-
PULPROG   zg30
TD         65536
SOLVENT   CDC13
NS         16
DS         0
SWH        8012.820 Hz
FIDRES     0.122266 Hz
AQ         4.0894966 sec
RG         181
DW         62.400 usec
DE         6.50 usec
TE         293.2 K
D1         4.0000000 sec
TD0        1

===== CHANNEL f1 =====
NUC1      1H
P1        14.00 usec
PL1       -2.00 dB
PL1W      11.86359406 W
SFO1      400.2236020 MHz
SI        32768
SF        400.2200000 MHz
WDW       EM
SSB        0
LB         0.30 Hz
GB         0
PC         1.00
    
```

Sample code: 9 ( rostami )

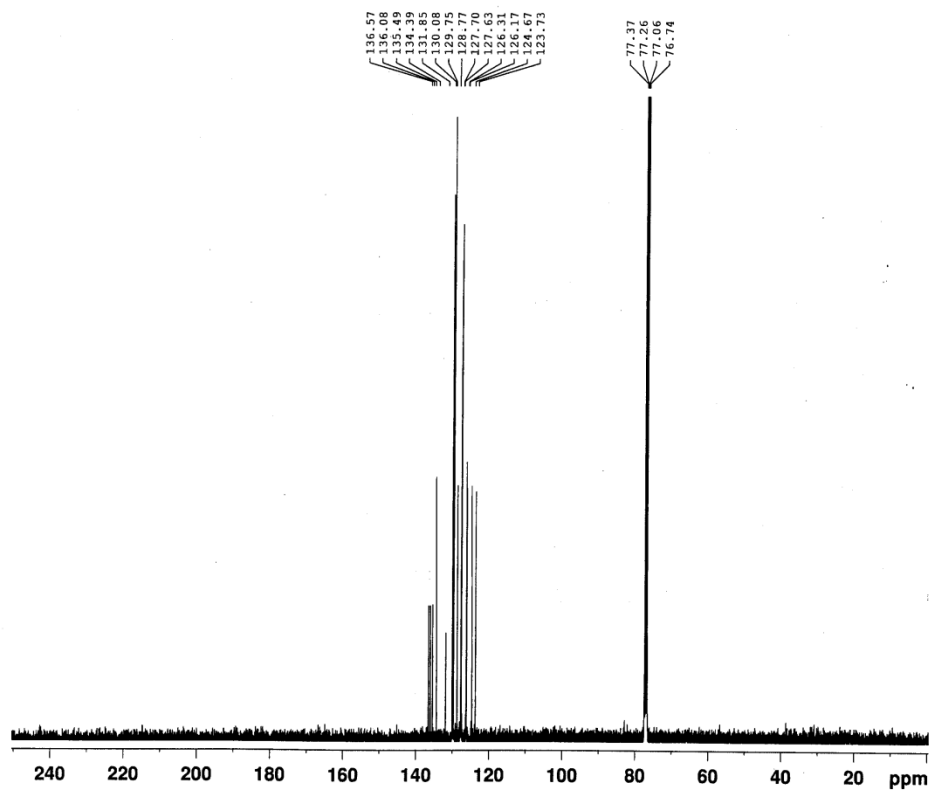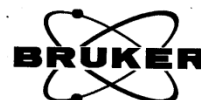

```

NAME      Kurdistan UN
EXPNO     101
PROCNO    1
Date_     20150510
Time      10.12
INSTRUM   spect
PROBHD    5 mm PABBO BB-
PULPROG   zgpg30
TD         65536
SOLVENT   CDC13
NS         1010
DS         0
SWH        25252.525 Hz
FIDRES     0.385323 Hz
AQ         1.2976629 sec
RG         2050
DW         19.800 usec
DE         6.50 usec
TE         293.4 K
D1         2.0000000 sec
D11        0.03000000 sec
TD0        1

===== CHANNEL f1 =====
NUC1      13C
P1         9.00 usec
PL1        -0.90 dB
PL1W      42.02801895 W
SFO1      100.6479784 MHz

===== CHANNEL f2 =====
CPDPRG2   waltz16
NUC2      1H
PCPD2     90.00 usec
PL2       -2.00 dB
PL12      14.16 dB
PL13      17.90 dB
PL2W      11.86359406 W
PL12W     0.28722104 W
PL13W     0.12139934 W
SFO2      400.2216009 MHz
SI        32768
SF        100.6353990 MHz
WDW       EM
SSB        0
LB         1.00 Hz
GB         0
PC         1.40
    
```

The <sup>1</sup>H NMR and <sup>13</sup>C NMR spectra of phenyl 4-nitro phenyl sulfide (Table 2, entry 12) [4]

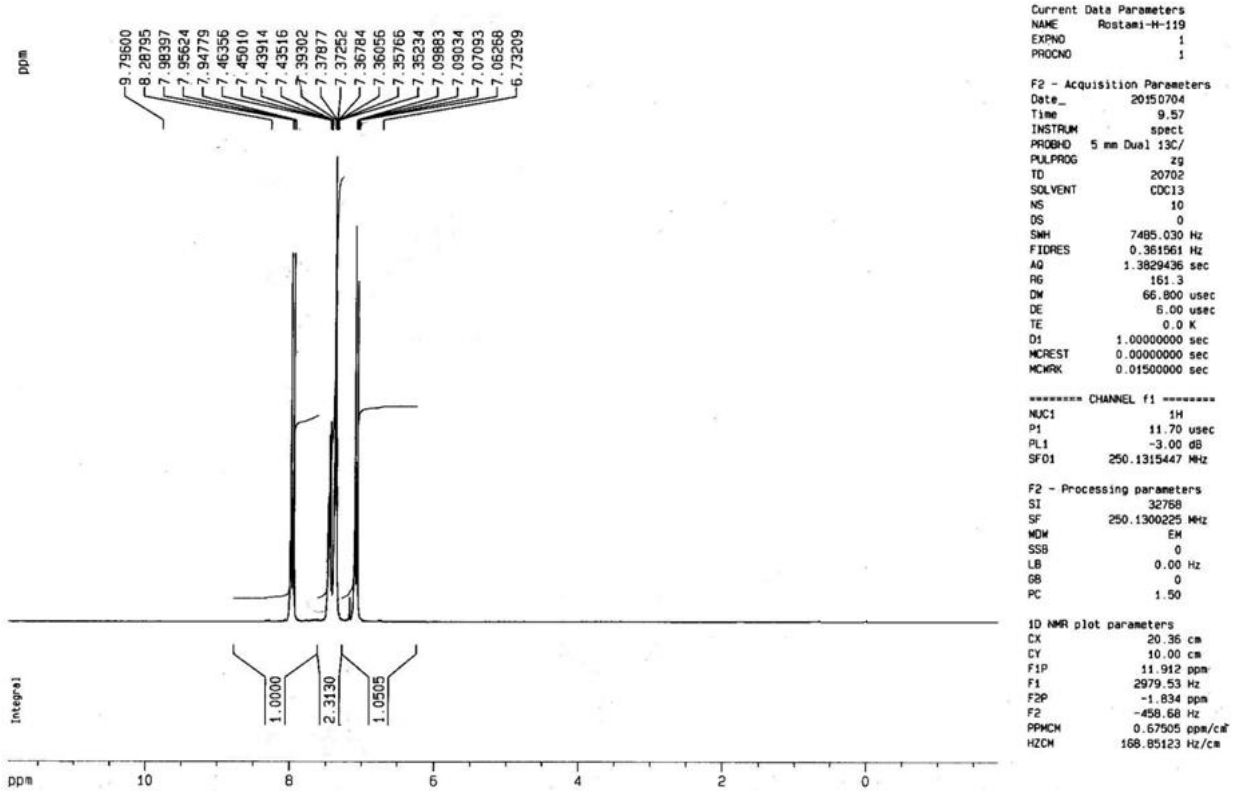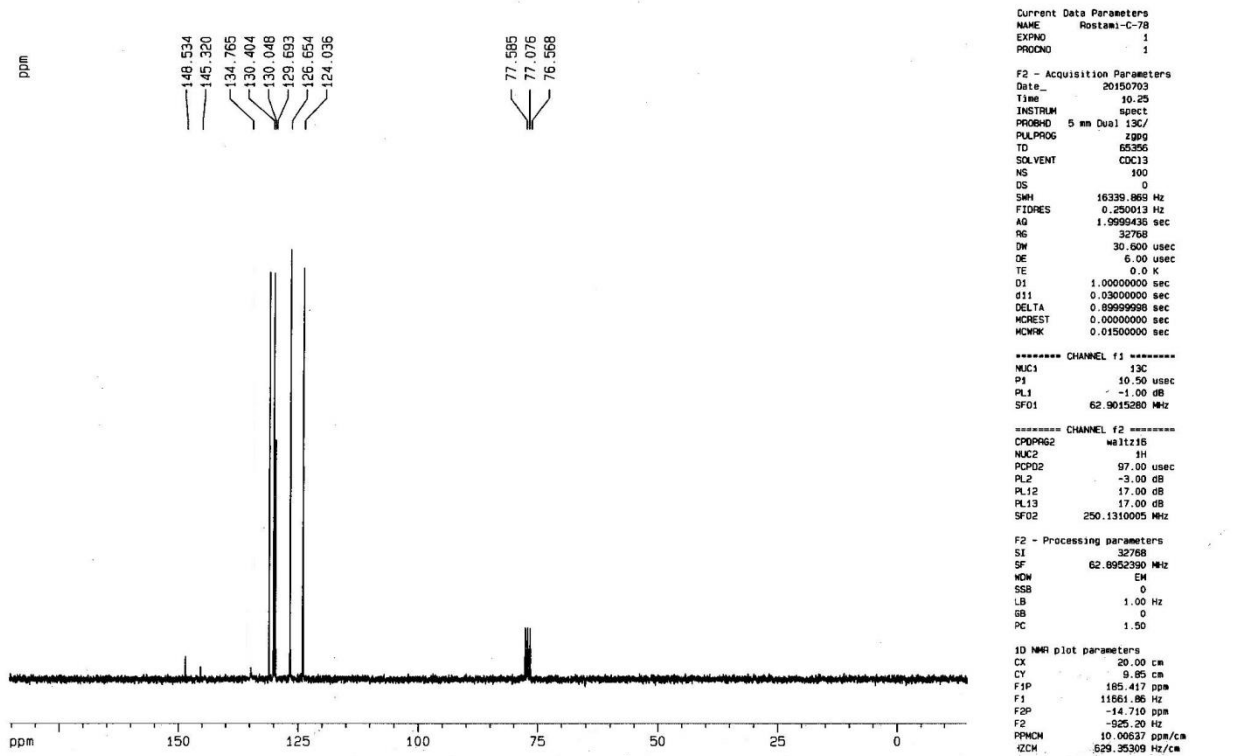

# The <sup>1</sup>H-NMR and <sup>13</sup>C-NMR spectra of phenyl (2-pyridyl) sulfide (Table 2, entry 14) [3]

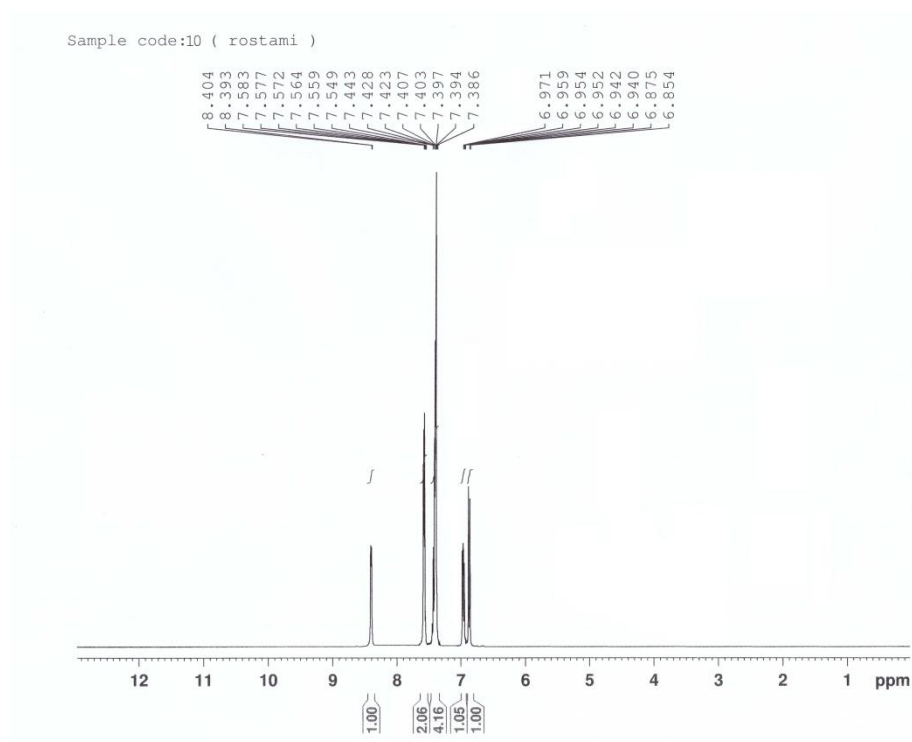

**BRUKER**

```

NAME      Kurdistan UN
EXPNO     108
PROCNO    1
Date_     20150808
Time      11.53
INSTRUM   spect
PROBHD    5 mm PABBO BB-
PULPROG   zg30
TD         65536
SOLVENT   CDCl3
NS         8
DS         0
SWH        8012.820 Hz
FIDRES     0.122266 Hz
AQ         4.0894966 sec
RG         22.6
DW         62.400 usec
DE         6.50 usec
TE         297.2 K
D1         4.00000000 sec
TD0        1

===== CHANNEL f1 =====
NUC1       1H
P1         14.00 usec
PL1        -2.00 dB
PLLW       11.86359406 W
SFO1       400.2236020 MHz
SI         32768
SF         400.2200000 MHz
WDW        EM
SSB        0
LB         0.30 Hz
GB         0
PC         1.00
    
```

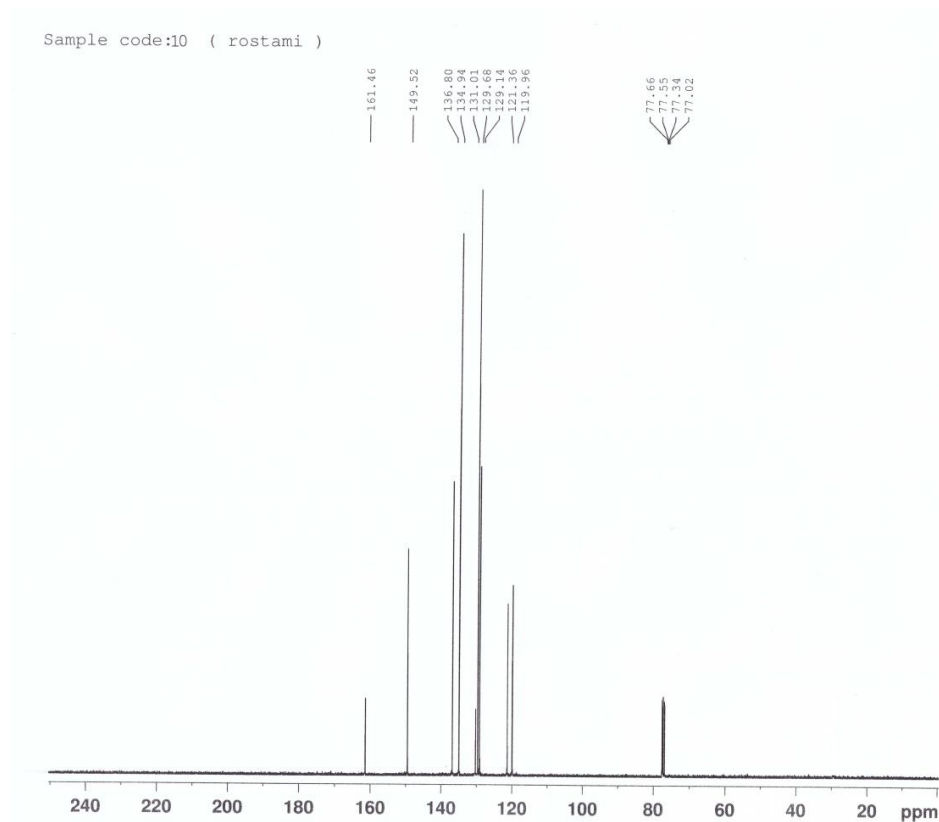

**BRUKER**

```

NAME      Kurdistan UN
EXPNO     109
PROCNO    1
Date_     20150808
Time      11.57
INSTRUM   spect
PROBHD    5 mm PABBO BB-
PULPROG   zgpg30
TD         65536
SOLVENT   CDCl3
NS         60
DS         0
SWH        25252.525 Hz
FIDRES     0.385323 Hz
AQ         1.2976623 sec
RG         2050
DW         19.800 usec
DE         6.50 usec
TE         297.4 K
D1         2.00000000 sec
D11        0.03000000 sec
TD0        1

===== CHANNEL f1 =====
NUC1       13C
P1         9.00 usec
PL1        -0.90 dB
PLLW       42.02801895 W
SFO1       100.6479784 MHz

===== CHANNEL f2 =====
CPDPRG2   waltz16
NUC2       1H
PCPD2     90.00 usec
PL2        -2.00 dB
PL12       14.16 dB
PL13       17.90 dB
PL2W       11.86359406 W
PL12W      0.28722104 W
PL13W      0.12139934 W
SFO2       400.2216009 MHz
SI         32768
SF         100.6353990 MHz
WDW        EM
SSB        0
LB         1.00 Hz
GB         0
PC         1.40
    
```

The <sup>1</sup>H NMR and <sup>13</sup>C NMR spectra of 4,4'-dimethoxy diphenyl sulfide (Table 4, entry 2) [7]

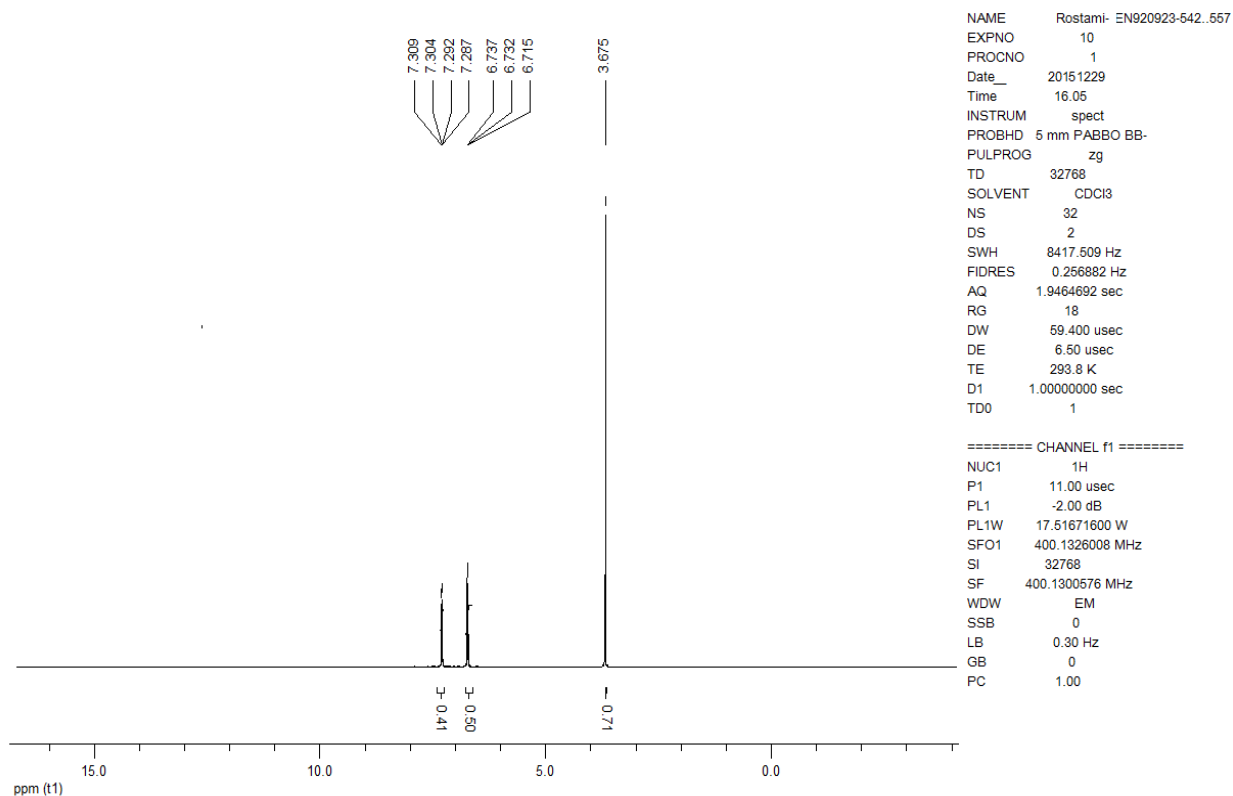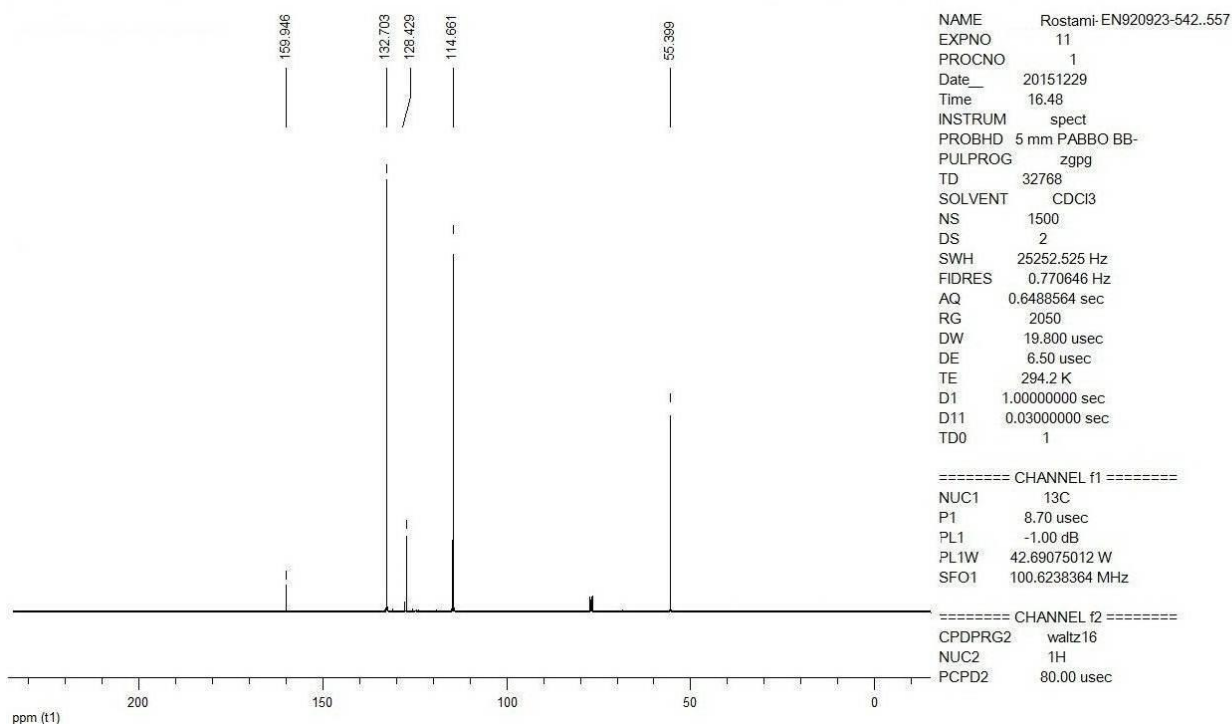



The <sup>1</sup>H-NMR and <sup>13</sup>C-NMR spectra of di-*o*-tolyl sulfide (Table 4, entry 7) [5]

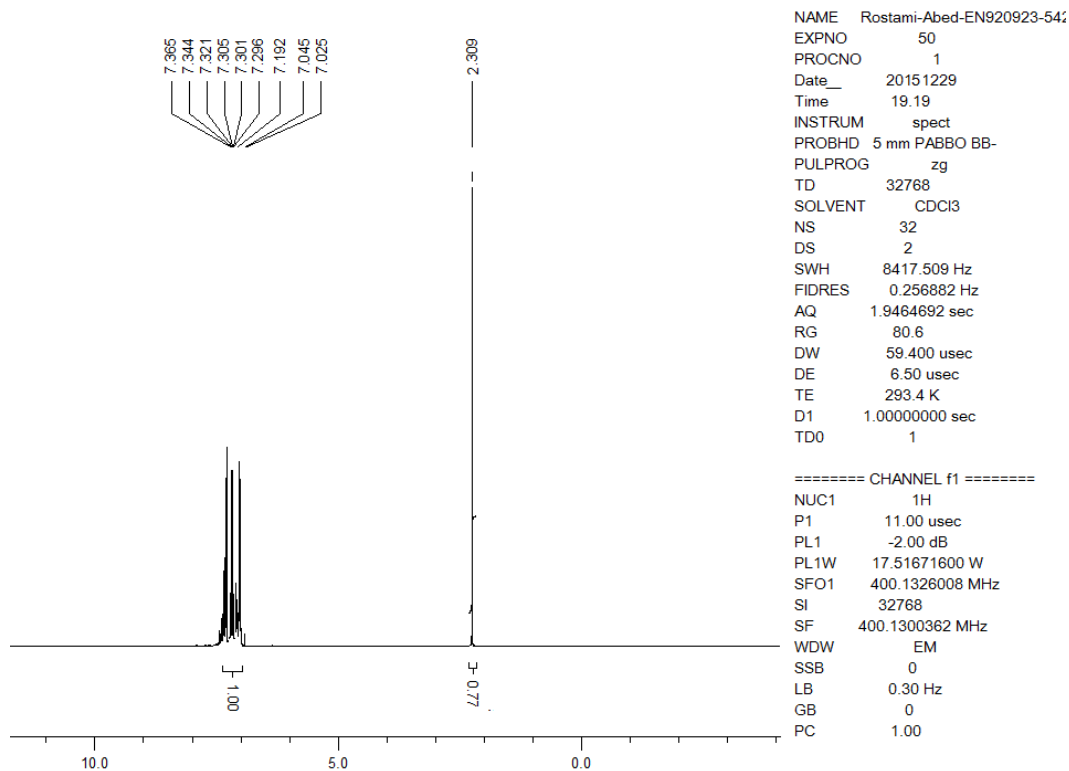

NAME Rostami-Abed-EN920923-54;  
 EXPNO 50  
 PROCNO 1  
 Date\_ 20151229  
 Time 19.19  
 INSTRUM spect  
 PROBHD 5 mm PABBO BB-  
 PULPROG zg  
 TD 32768  
 SOLVENT CDCl3  
 NS 32  
 DS 2  
 SWH 8417.509 Hz  
 FIDRES 0.256882 Hz  
 AQ 1.9464692 sec  
 RG 80.6  
 DW 59.400 usec  
 DE 6.50 usec  
 TE 293.4 K  
 D1 1.00000000 sec  
 TD0 1

===== CHANNEL f1 =====  
 NUC1 1H  
 P1 11.00 usec  
 PL1 -2.00 dB  
 PL1W 17.51671600 W  
 SFO1 400.1326008 MHz  
 SI 32768  
 SF 400.1300362 MHz  
 WDW EM  
 SSB 0  
 LB 0.30 Hz  
 GB 0  
 PC 1.00

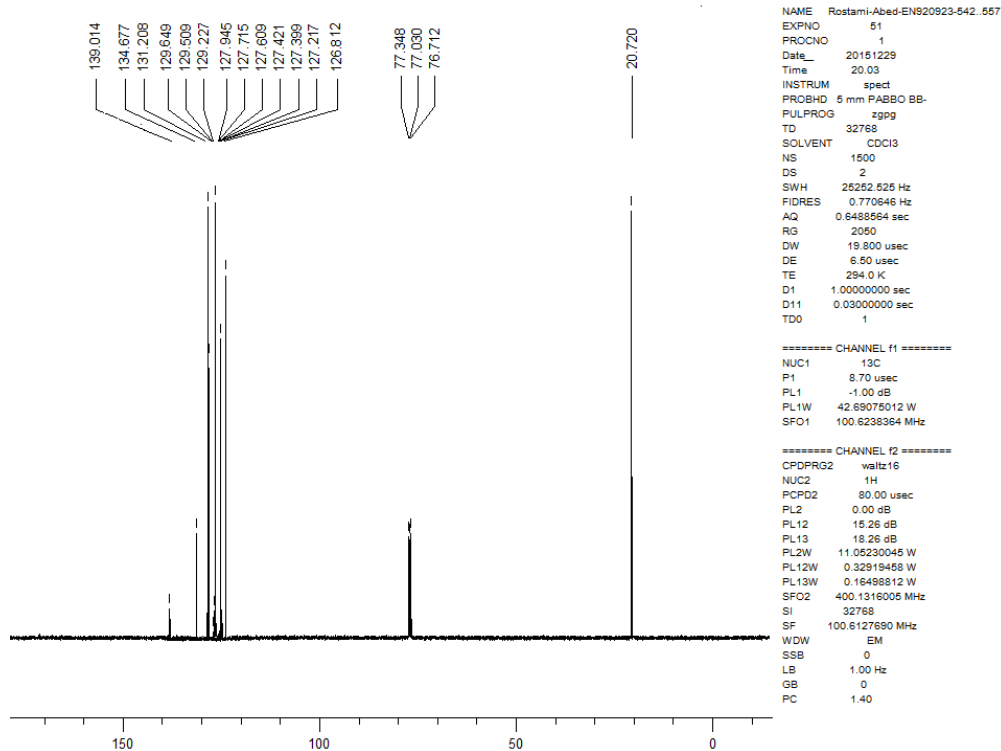

NAME Rostami-Abed-EN920923-542\_557  
 EXPNO 51  
 PROCNO 1  
 Date\_ 20151229  
 Time 20.03  
 INSTRUM spect  
 PROBHD 5 mm PABBO BB-  
 PULPROG zgpg  
 TD 32768  
 SOLVENT CDCl3  
 NS 1500  
 DS 2  
 SWH 25252.525 Hz  
 FIDRES 0.770646 Hz  
 AQ 0.6488564 sec  
 RG 2050  
 DW 19.900 usec  
 DE 6.50 usec  
 TE 294.0 K  
 D1 1.00000000 sec  
 D11 0.03000000 sec  
 TD0 1

===== CHANNEL f1 =====  
 NUC1 13C  
 P1 8.70 usec  
 PL1 -1.00 dB  
 PL1W 42.69075012 W  
 SFO1 100.6238364 MHz

===== CHANNEL f2 =====  
 CPDPRG2 waltz16  
 NUC2 1H  
 PCPD2 80.00 usec  
 PL2 0.00 dB  
 PL12 15.26 dB  
 PL13 18.26 dB  
 PL2W 11.05230045 W  
 PL12W 0.32919458 W  
 PL13W 0.16459812 W  
 SFO2 400.1316005 MHz  
 SI 32768  
 SF 100.6127690 MHz  
 WDW EM  
 SSB 0  
 LB 1.00 Hz  
 GB 0  
 PC 1.40

# The <sup>1</sup>H-NMR and <sup>13</sup>C-NMR spectra of di-1-naphthyl sulfide (Table 4, entry 9) [6]

Sample code:5 ( rostami )

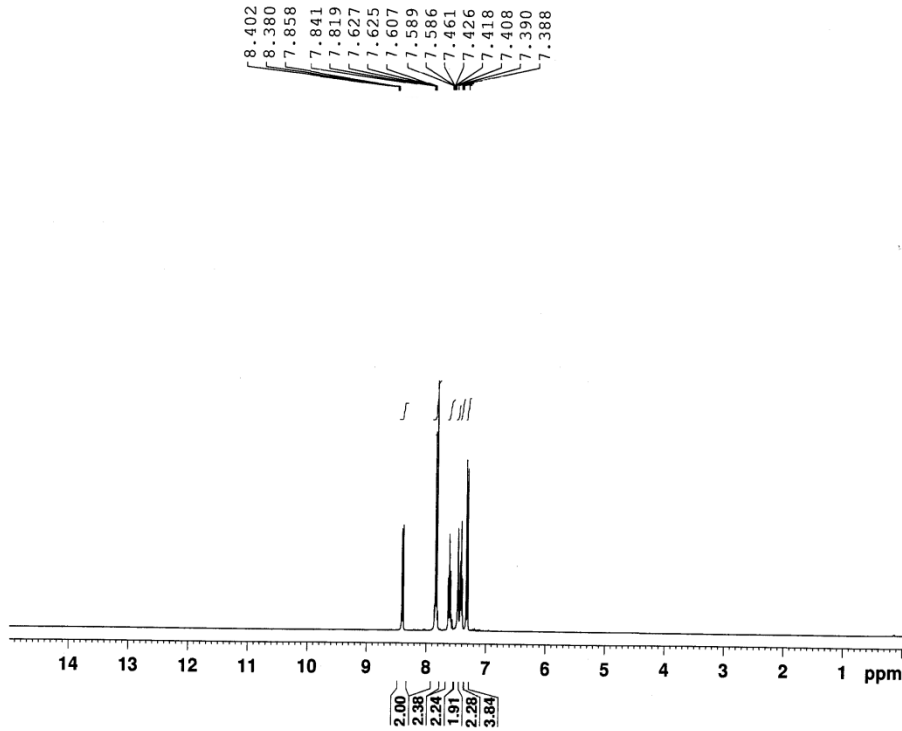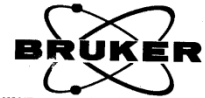

```

NAME      Kurdistan UN
EXPNO     94
PROCNO    1
Date_     20150510
Time      9.16
INSTRUM   spect
PROBHD    5 mm PABBO BB-
PULPROG   zg30
TD         65536
SOLVENT   CDCl3
NS         16
DS         0
SWH        8012.820 Hz
FIDRES    0.122266 Hz
AQ         4.0894966 sec
RG         57
DW         62.400 usec
DE         6.50 usec
TE         293.1 K
D1         4.0000000 sec
TD0        1
    
```

```

===== CHANNEL f1 =====
NUC1      1H
P1         14.00 usec
PL1        -2.00 dB
PL1W      11.86359406 W
SFO1      400.2236020 MHz
SI         32768
SF         400.2200000 MHz
WDW        EM
SSB         0
LB         0.30 Hz
GB         0
PC         1.00
    
```

Sample code: 5 ( rostami )

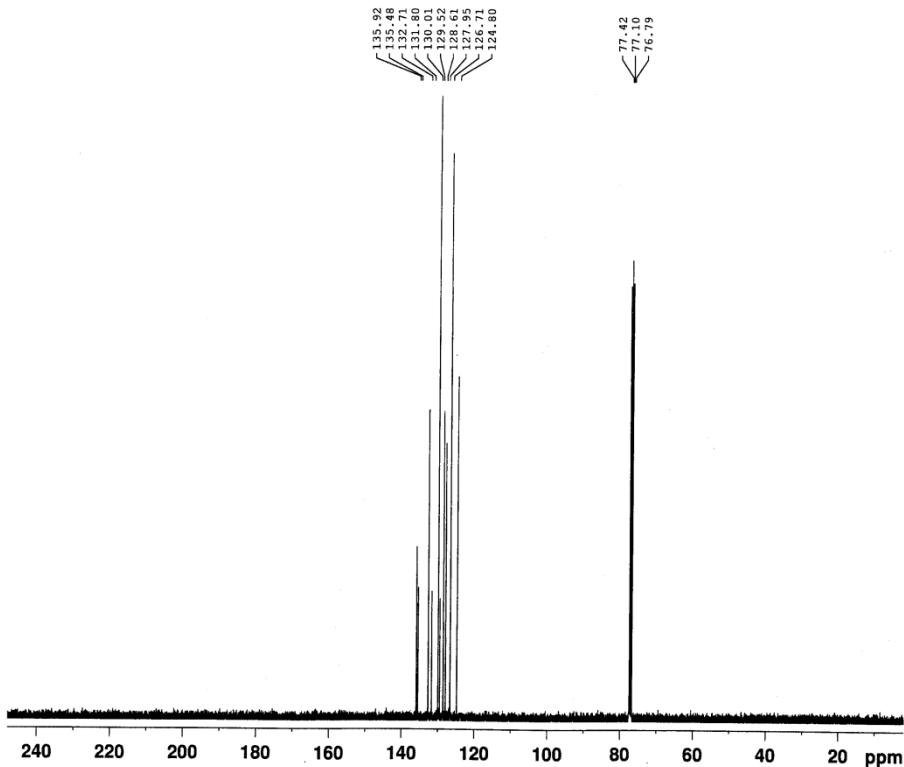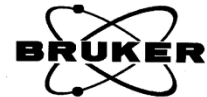

```

NAME      Kurdistan UN
EXPNO     96
PROCNO    1
Date_     20150510
Time      9.27
INSTRUM   spect
PROBHD    5 mm PABBO BB-
PULPROG   zgpg30
TD         65536
SOLVENT   CDCl3
NS         140
DS         0
SWH        25252.525 Hz
FIDRES    0.385323 Hz
AQ         1.2976629 sec
RG         2050
DW         19.800 usec
DE         6.50 usec
TE         293.5 K
D1         2.0000000 sec
D11        0.0300000 sec
TD0        1
    
```

```

===== CHANNEL f1 =====
NUC1      13C
P1         9.00 usec
PL1        -0.90 dB
PL1W      42.02801895 W
SFO1      100.6479784 MHz
    
```

```

===== CHANNEL f2 =====
CPDPRG2   waltz16
NUC2      1H
PCPD2     90.00 usec
PL2        -2.00 dB
PL12      14.16 dB
PL13      17.90 dB
PL2W      11.86359406 W
PL12W     0.28722104 W
PL13W     0.12139934 W
SFO2      400.2216009 MHz
SI         32768
SF         100.6353990 MHz
WDW        EM
SSB         0
LB         1.00 Hz
GB         0
PC         1.40
    
```

The <sup>1</sup>H NMR and <sup>13</sup>C NMR spectra of 4, 4'-dinitro diphenyl sulfide (Table 4, entry 12) [8]

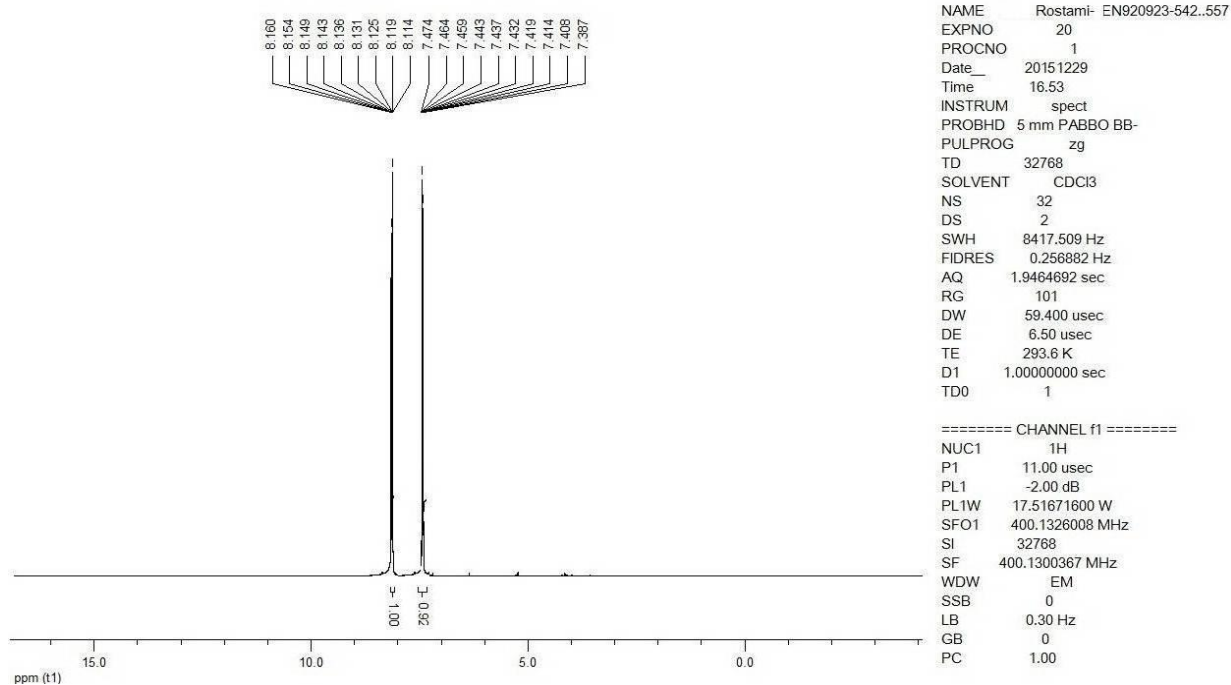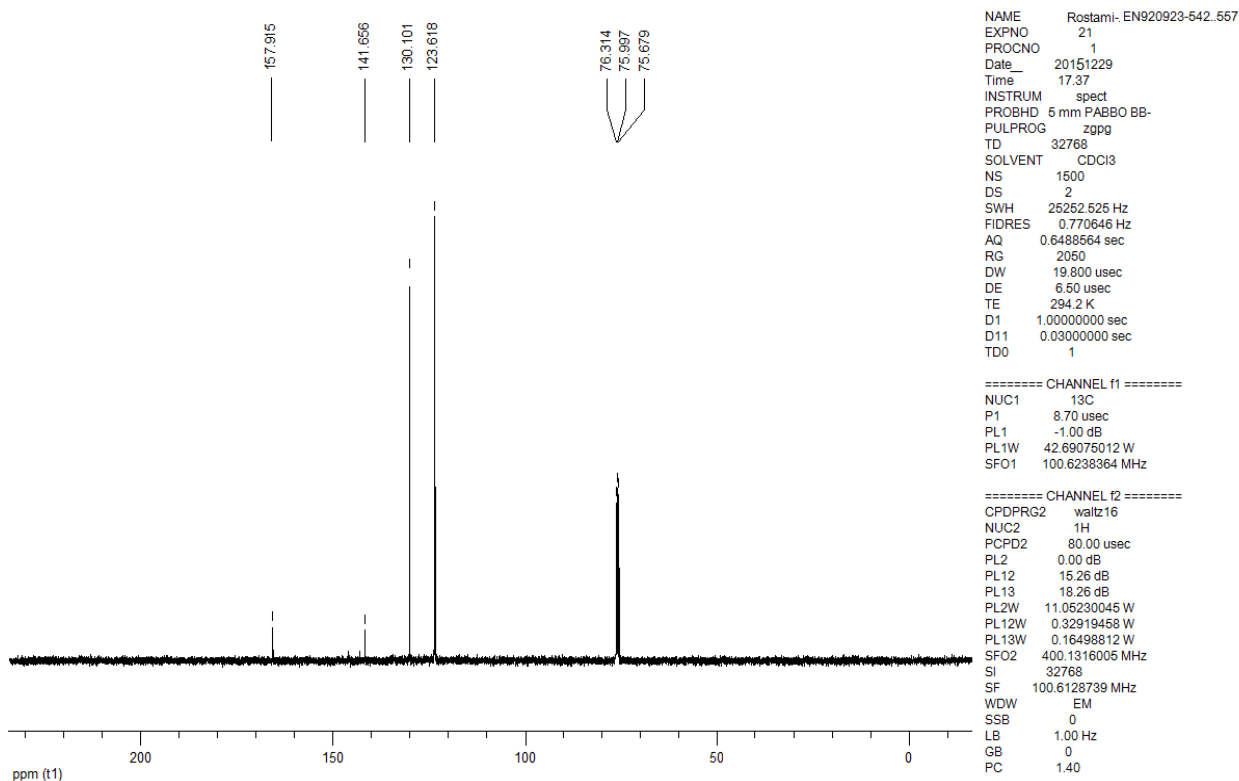

The <sup>1</sup>H-NMR and <sup>13</sup>C-NMR spectra of di-2-pyridyl sulfide (Table 4, entry 14) [5]

Sample code:12 ( rostami )

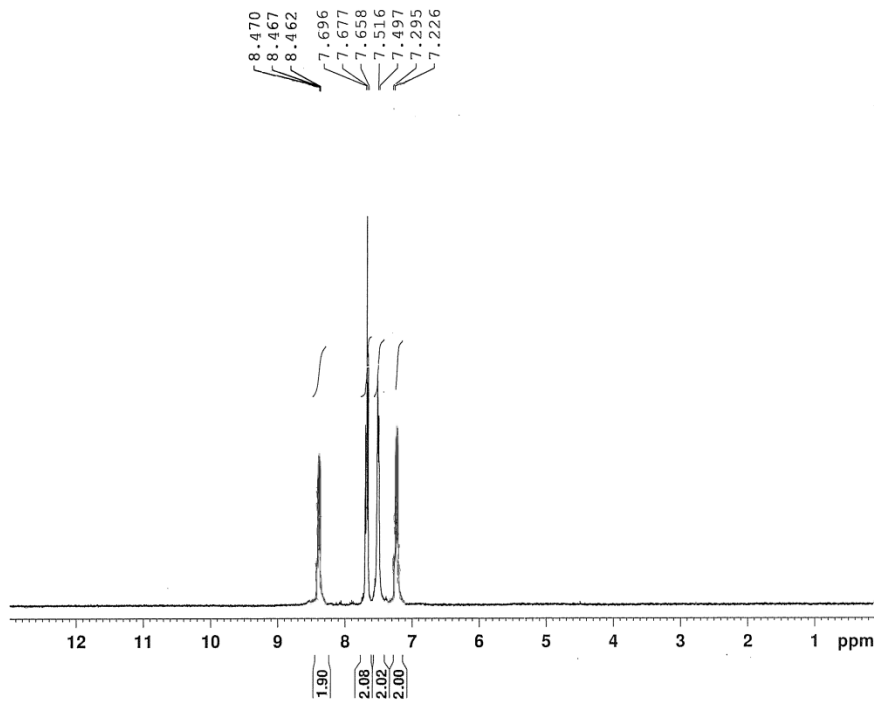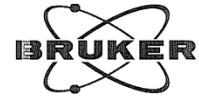

```

NAME: Kurdistan UN
EXPTNO: 112
PROCNO: 1
Date_: 20150808
Time: 12.08
INSTRUM: spect
PROBHD: 5 mm PABBO BB-
PULPROG: zg30
TD: 65536
SOLVENT: CDCl3
NS: 16
DS: 0
SWH: 8012.820 Hz
FIDRES: 0.122266 Hz
AQ: 4.0894966 sec
RG: 287
DW: 62.400 usec
DE: 6.50 usec
TE: 297.2 K
D1: 4.0000000 sec
TDI:
    
```

```

===== CHANNEL f1 =====
NUC1: 1H
P1: 14.00 usec
PL1: -2.00 dB
PL12: 11.86359406 W
SFO1: 400.2236020 MHz
SI: 32768
SF: 400.2200000 MHz
WDW: EM
SFE: 0
LB: 0.30 Hz
GB: 0
PC: 1.00
    
```

Sample code:12 ( rostami )

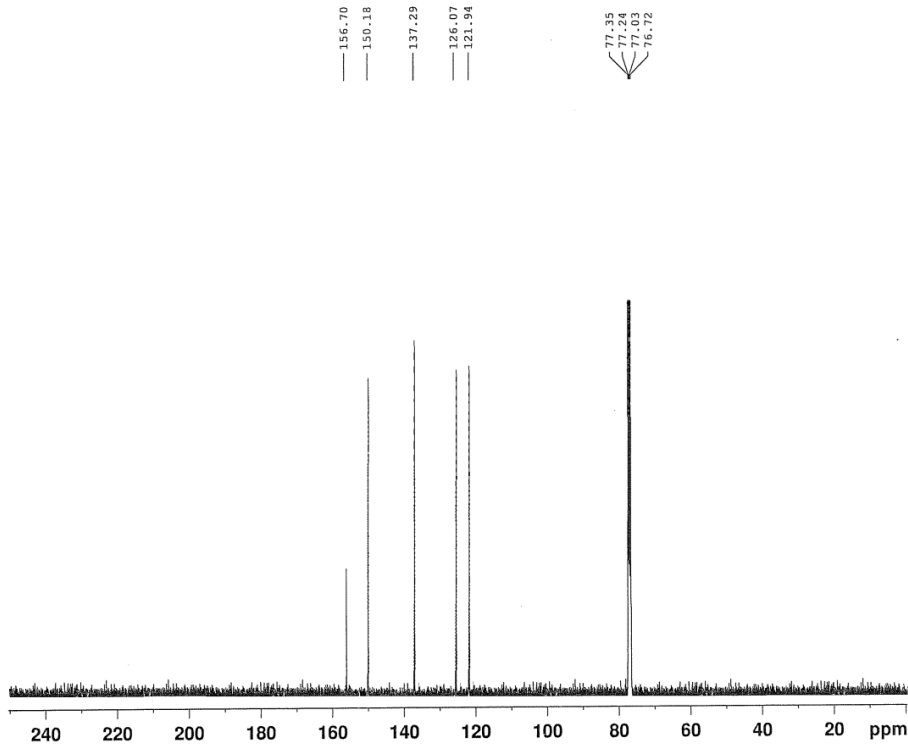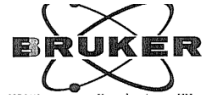

```

NAME: Kurdistan UN
EXPTNO: 113
PROCNO: 1
Date_: 20150808
Time: 13.57
INSTRUM: spect
PROBHD: 5 mm PABBO BB-
PULPROG: zgpg30
TD: 65536
SOLVENT: CDCl3
NS: 4621
DS: 0
SWH: 25252.525 Hz
FIDRES: 0.385323 Hz
AQ: 1.2976629 sec
RG: 2050
DW: 19.800 usec
DE: 6.50 usec
TE: 297.4 K
D1: 1.00000000 sec
D11: 0.03000000 sec
TDI: 1
    
```

```

===== CHANNEL f1 =====
NUC1: 13C
P1: 9.00 usec
PL1: -0.90 dB
PL12: 42.02801895 W
SFO1: 100.6479784 MHz
    
```

```

===== CHANNEL f2 =====
CPDPRG2: waltz16
NUC2: 1H
PCPD2: 90.00 usec
PL12: -2.00 dB
PL1: 14.16 dB
PL12: 17.90 dB
PL12W: 11.86359406 W
PL1W: 0.28722104 W
PL12W: 0.12139934 W
SFO2: 400.2216009 MHz
SI: 32768
SF: 100.6353990 MHz
WDW: EM
SFE: 0
LB: 1.00 Hz
GB: 0
PC: 1.40
    
```

### 3. Reference

1. N. Park, K. Park, M. Jang and S. Lee, *J. Org. Chem.* 2011, **76**, 4371.
2. J. Y. Lee and P. H. Lee, *J. Org. Chem.* 2008, **73**, 7413.
3. N. Singh, R. Singh, D. S. Raghuvanshi and K. N. Singh, *Org. Lett.* 2013, **15**, 5874.
4. A. Rostami, A. Rostami, A. Ghaderi and M. A. Zolfigol, *RSC Adv.* 2015, **5**, 37060.
5. P. Zhao, H. Yin, H. Gao and C. Xi, *J. Org. Chem.* 2013, **78**, 5001.
6. M. Kuhn and F. C. Falk, *Org. Lett.* 2011, **13**, 4100.
7. G. Liu, J. R. Huth, E. T. Olejniczak, R. Mendoza, P. De-Vries, S. Leitz, E. B. Reilly, G. F. Okasinski, E. Nielsen, S. W. Fesik and T. W. Geldern, *J. Med. Chem.* 2001, **44**, 1202.
8. D. J. C. Prasad and G. Sekar, *Org. Lett.* 2011, **13**, 1008.
